# Supplementary material for: Myo1g is required for efficient adhesion and migration of activated B lymphocytes to inguinal lymph nodes
Source: Springer Nature journal article supplement (doi:10.1038/s41598-021-85477-y), 2021-03-30
Supplement: 41598_2021_85477_MOESM1_ESM.pdf [file 41598_2021_85477_MOESM1_ESM.pdf]

## **Supplementary Information**

### **Myo1g is required for efficient adhesion and migration of activated B lymphocytes to inguinal lymph nodes**

Cruz-Zárate D<sup>1,3\*</sup>, López-Ortega O<sup>1\*</sup>, Girón-Pérez D<sup>1\*</sup>, Gonzalez-Suarez AM<sup>2</sup>,  
García-Cordero JL<sup>2</sup>, Schnoor M<sup>1</sup>, \*Santos-Argumedo L<sup>1</sup>

These authors equally contributed to this manuscript

<sup>1</sup>Departamento de Biomedicina Molecular, Centro de Investigación y de Estudios Avanzados del Instituto Politécnico Nacional (CINVESTAV-IPN), México City

<sup>2</sup>Unidad Monterrey, Centro de Investigación y de Estudios Avanzados del Instituto Politécnico Nacional (CINVESTAV-IPN), Monterrey NL, México

<sup>3</sup>Departamento & Posgrado en Inmunología, Escuela Nacional de Ciencias Biológicas del Instituto Politécnico Nacional (ENCB-IPN), México City, México

#### **Corresponding author information**

Leopoldo Santos-Argumedo

Av. Instituto Politécnico Nacional 2508,

San Pedro Zacatenco,

07360 Ciudad de México

Telephone number: +52 (55) 5747-3800 ext: 5020

Fax number: +52 (55) 5747-3800 ext: 5020

E-mail Address: lesantos@cinvestav.mx

## Supplementary Figure S1

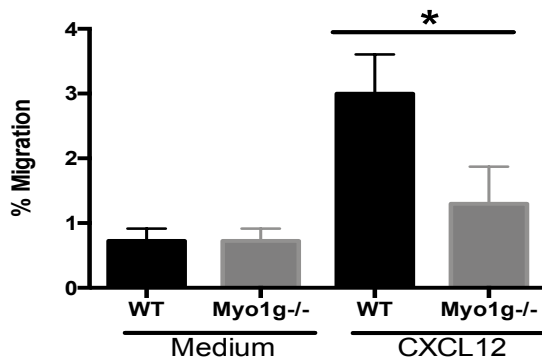

### Trans-well migration of LPS + IL-4 activated WT and Myo1g<sup>-/-</sup> B lymphocytes.

1.5x10<sup>4</sup> LPS + IL-4 activated WT, and Myo1g<sup>-/-</sup> B lymphocytes were placed in the 5 $\mu$ m pore-trans-well chamber's upper compartment. FCS or CXCL12 (100ng/ml) was added to the lower chamber. Data show the percentage of migration of activated B lymphocytes after 4h at 37°C. \*\*\*\*P<0.0001.

**Supplementary Video S2.** Representative video of LPS + IL-4 activated WT B lymphocytes moving through the venules of an inguinal lymph node previously (1 h) inoculated with CXCL13 (25ng/ml. (40x objective)

**Supplementary Video S3.** Representative video of LPS + IL-4 activated Myo1g<sup>-/-</sup> B lymphocytes moving through the venules of an inguinal lymph node previously (1 h) inoculated with CXCL13 (25ng/ml. (40x objective).

## Supplementary Figure S4

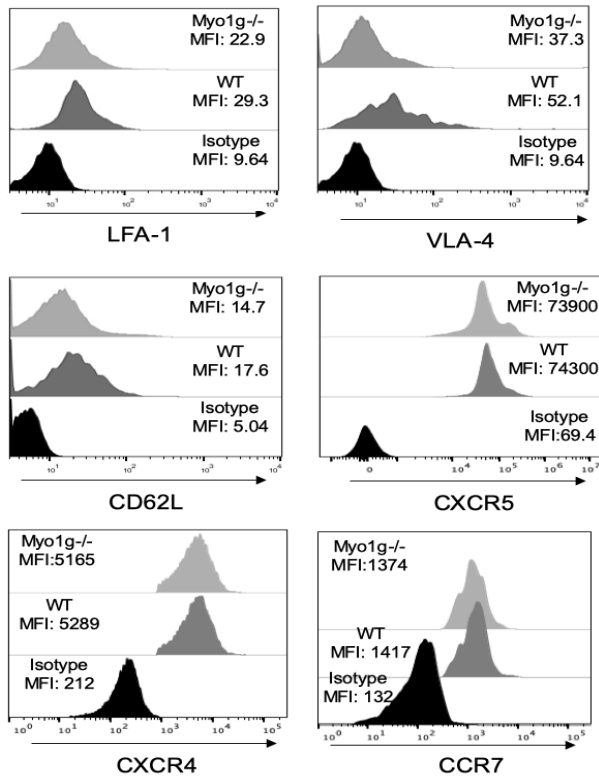

### Surface expression of adhesion molecules, integrins, and chemokine receptors in LPS + IL-4 activated WT and Myo1g<sup>-/-</sup> B lymphocytes.

Representative histograms and mean fluorescence intensity values of surface expression of adhesion molecules, integrins and chemokine receptors and isotype control antibodies in LPS + IL-4 activated WT and Myo1g<sup>-/-</sup> B lymphocytes.

## Supplementary Figure S5

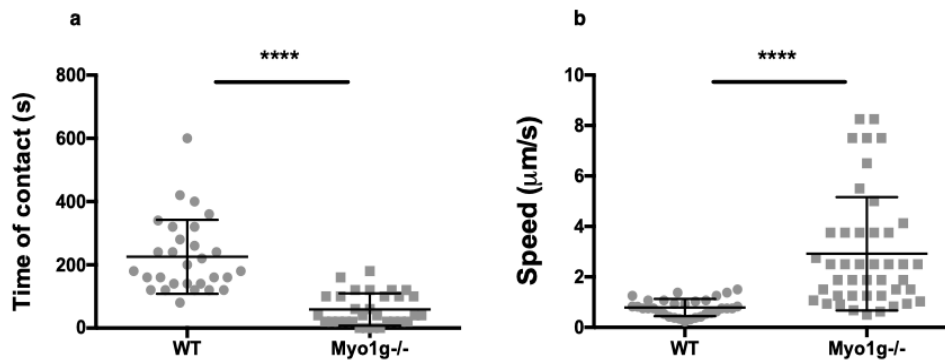

**Motility of LPS + IL-4 activated WT and Myo1g<sup>-/-</sup> B lymphocytes in a confined 3D microchannel with CXCL12 as a chemoattractant.** (a) Time of contact (s) of LPS + IL-4 activated WT or Myo1g<sup>-/-</sup> B lymphocytes within 10 µm microchannel wall stimulated by a gradient of CXCL12. (b) speed (µm/s) of B lymphocytes moving through a 10 µm microchannel. Data are presented as mean ± s.d.

\*P<0.01.

**Supplementary Video S6.** Representative video of LPS + IL-4 activated WT B lymphocytes moving through 10µm microchannel under CXCL13 gradient. (10x objective).

**Supplementary Video S7.** Representative video of LPS + IL-4 activated Myo1g<sup>-/-</sup> B lymphocytes moving through 10µm microchannel under CXCL13 gradient. (10x objective).

### Supplementary Figure S8

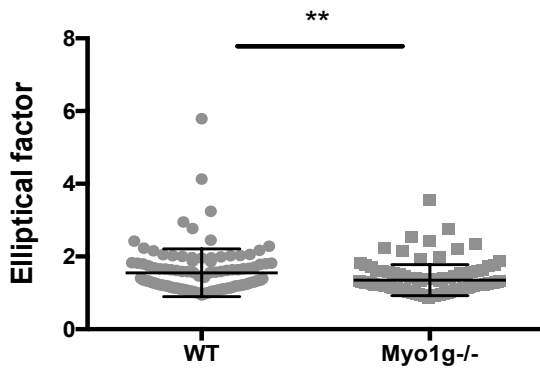

**Elliptical factor in LPS + IL-4 activated B lymphocytes.** Measurement of the elliptical factor of LPS + IL-4 activated WT or Myo1g<sup>-/-</sup> B lymphocytes on fibronectin-coated slides. Data correspond to three independent experiments. Data are presented as mean  $\pm$  s.d. \*\*\*\* $P < 0.0001$ .
